# Supplementary material
Source: HighWire-hosted journal article supplement (http://www.ajnr.org/highwire/filestream/90047/field_highwire_adjunct_files/0/0329.pdf)
Supplement: 0329.pdf [file 0329.pdf]

**Online Table 1. Variation in segmentation volumes and variability for BraTumIA 2.0 across 25 repetitions on identical datasets**

| <b>Segmented region</b>                                     | <b>Mean Segmentation volumes, mL</b> | <b>Mean Standard Deviation in segmentation volumes, mL (range)</b> | <b>Mean Coefficient of Variation, % (range)</b> | <b>Mean Generalized Conformity Index (range)</b> |
|-------------------------------------------------------------|--------------------------------------|--------------------------------------------------------------------|-------------------------------------------------|--------------------------------------------------|
| <b>Enhancing</b>                                            | 24.1                                 | 0.5<br>(0.07 – 1.3)                                                | 3.7<br>(0.7 – 19.3)                             | 0.84<br>(0.55 – 0.92)                            |
| <b>Edema</b>                                                | 92.3                                 | 1.7<br>(0.4 – 4.8)                                                 | 2.2<br>(0.5 – 8.0)                              | 0.85<br>(0.74 – 0.92)                            |
| <b>Non-enhancing</b>                                        | 2.7                                  | 0.3<br>(0.007 – 1.2)                                               | 19.5<br>(4.6 – 67.1)                            | 0.47<br>(0.19 – 0.73)                            |
| <b>Necrotic</b>                                             | 6.9                                  | 0.3<br>(0.07 – 1.0)                                                | 14.4<br>(1.0 – 67.3)                            | 0.66<br>(0.23 – 0.90)                            |
| <b>Total Tumor-related Abnormality</b>                      | 126.1                                | 1.8<br>(0.8 – 5.0)                                                 | 1.7<br>(0.5 – 7.5)                              | 0.89<br>(0.78 – 0.94)                            |
| <b>Total Non-enhancing Tumor-related Abnormality</b>        | 101.9                                | 1.7<br>(0.7 – 4.9)                                                 | 2.0<br>(0.5 – 7.7)                              | 0.86<br>(0.74 – 0.92)                            |
| <b>Non-enhancing Non-necrotic Tumor-related Abnormality</b> | 95.1                                 | 1.7<br>(0.6 – 4.8)                                                 | 2.1<br>(0.5 – 7.6)                              | 0.86<br>(0.74 – 0.92)                            |
| <b>White Matter</b>                                         | 547.6                                | 4.7<br>(1.1 – 29.4)                                                | 0.9<br>(0.2 – 6.1)                              | 0.93<br>(0.87 – 0.97)                            |
| <b>Gray Matter</b>                                          | 605.8                                | 6.7<br>(1.5 – 25.3)                                                | 1.1<br>(0.3 – 4.9)                              | 0.89<br>(0.83 – 0.95)                            |

**Online Table 2. Mean Volumes, within-subject standard deviations and total standard deviation for Automatically Segmented Volumes (in mL).**

| Segmented region                                        | Mean Volumes<br>(range) |                    | Within-subject<br>Standard Deviation |      | Total Standard<br>Deviation |     |
|---------------------------------------------------------|-------------------------|--------------------|--------------------------------------|------|-----------------------------|-----|
|                                                         | BraTumIA Version<br>1.2 | 2.0                | 1.2                                  | 2.0  | 1.2                         | 2.0 |
| Enhancing                                               | 25.2<br>(0.2 - 66)      | 23.9<br>(0.4 - 64) | 2.5                                  | 1.9  | 17                          | 17  |
| Edema                                                   | 95.6<br>(46 - 180)      | 92.2<br>(43 - 176) | 8.7                                  | 11   | 36                          | 35  |
| Non-enhancing                                           | 3.0<br>(0.01 - 12)      | 2.7<br>(0 - 10.0)  | 0.77                                 | 0.71 | 3                           | 2.4 |
| Necrotic                                                | 5.8<br>(0.1 – 55)       | 6.8<br>(0.2– 55)   | 1.1                                  | 0.74 | 12                          | 12  |
| Total Tumor-related<br>Abnormality                      | 130<br>(53 – 252)       | 126<br>(50 – 241)  | 9                                    | 11   | 53                          | 49  |
| Total Non-enhancing Tumor-<br>related Abnormality       | 104<br>(46 – 189)       | 102<br>(44 – 182)  | 8.5                                  | 11   | 40                          | 37  |
| Non-enhancing Non-necrotic<br>Tumor-related Abnormality | 98.7<br>(46 – 189)      | 94.8<br>(44 -179)  | 8.7                                  | 11   | 38                          | 36  |
| White Matter                                            | 544<br>(446 – 644)      | 547<br>(448 – 649) | 15                                   | 17   | 50                          | 53  |
| Gray Matter                                             | 596<br>(497 – 685)      | 610<br>(521 – 711) | 17                                   | 16   | 54                          | 55  |

**Online Table 3. Intraclass Correlation Coefficient and Concordance Correlation Coefficient for Automatically Segmented Volumes.**

| Segmented region                                            | ICC (95% CI) <sup>a</sup> |                       | CCC (95% CI) <sup>b</sup> |                       |
|-------------------------------------------------------------|---------------------------|-----------------------|---------------------------|-----------------------|
|                                                             | 1.2                       | 2.0                   | 1.2                       | 2.0                   |
| <b>BraTumIA Version</b>                                     | <b>1.2</b>                | <b>2.0</b>            | <b>1.2</b>                | <b>2.0</b>            |
| <b>Enhancing</b>                                            | 0.98<br>(0.95 - 0.99)     | 0.99<br>(0.97 - 1)    | 0.97<br>(0.94 - 0.99)     | 0.98<br>(0.96 - 0.99) |
| <b>Edema</b>                                                | 0.94<br>(0.87 - 0.98)     | 0.91<br>(0.79 - 0.96) | 0.94<br>(0.87 - 0.98)     | 0.91<br>(0.79 - 0.96) |
| <b>Non-enhancing</b>                                        | 0.94<br>(0.85 - 0.97)     | 0.92<br>(0.80 - 0.97) | 0.94<br>(0.85 - 0.97)     | 0.91<br>(0.80 - 0.96) |
| <b>Necrotic</b>                                             | 0.99<br>(0.98 - 1)        | 1<br>(0.99 - 1)       | 0.99<br>(0.98 - 1)        | 1<br>(0.99 - 1)       |
| <b>Total Tumor-related Abnormality</b>                      | 0.97<br>(0.93 - 0.99)     | 0.95<br>(0.88 - 0.98) | 0.97<br>(0.94 - 0.99)     | 0.95<br>(0.89 - 0.98) |
| <b>Total Non-enhancing Tumor-related Abnormality</b>        | 0.96<br>(0.89 - 0.98)     | 0.92<br>(0.81 - 0.97) | 0.96<br>(0.90 - 0.98)     | 0.92<br>(0.82 - 0.97) |
| <b>Non-enhancing Non-necrotic Tumor-related Abnormality</b> | 0.95<br>(0.88 - 0.98)     | 0.91<br>(0.80 - 0.97) | 0.95<br>(0.89 - 0.98)     | 0.91<br>(0.80 - 0.96) |
| <b>White Matter</b>                                         | 0.92<br>(0.81 - 0.97)     | 0.90<br>(0.77 - 0.96) | 0.92<br>(0.81 - 0.97)     | 0.90<br>(0.77 - 0.96) |
| <b>Gray Matter</b>                                          | 0.91<br>(0.79 - 0.96)     | 0.92<br>(0.80 - 0.97) | 0.91<br>(0.78 - 0.96)     | 0.92<br>(0.81 - 0.97) |

Abbreviations: CCC = Concordance Correlation Coefficient; CI = Confidence Intervals; ICC = Intraclass  
Correlation Coefficient

<sup>a</sup> CIs calculated using F-distribution

<sup>b</sup> CIs calculated using Fisher's Z-transformation
